# Supplementary material
Source: PubMed Central journal article supplement (PMC4156518)
Supplement: NIHMS612672-supplement-02.pdf [file NIHMS612672-supplement-02.pdf]

**Table S1.** Initial ASO<sup>-</sup> transport rates for WT and mutant UCP2s, related to Figure 5 and 6

| <b>ASO<sup>-</sup> Transport Assay</b>                                                     | <b>Initial Slope</b> | <b>Standard Error</b> | <b>Number of replicates</b> | <b>% ASO transport inhibition</b> |
|--------------------------------------------------------------------------------------------|----------------------|-----------------------|-----------------------------|-----------------------------------|
| W.T.                                                                                       | -169.71              | 9.24                  | 4                           | 0.0                               |
| W.T+GDP                                                                                    | -9.96                | 8.62                  | 3                           | 94.1                              |
| <b>Mutations affecting ASO<sup>-</sup> transport but not GDP inhibition</b>                |                      |                       |                             |                                   |
| R60S                                                                                       | -42.03               | 7.32                  | 3                           | 75.2                              |
| R60S+GDP                                                                                   | -17.91               | 8.44                  | 2                           | 89.4                              |
| K271S                                                                                      | -76.81               | 9.10                  | 3                           | 54.7                              |
| K271S+GDP                                                                                  | -10.91               | 10.33                 | 2                           | 92.0                              |
| R60S,K271S                                                                                 | -36.19               | 14.92                 | 2                           | 78.7                              |
| R60S,K271S+GD                                                                              |                      |                       | 2                           | 93.6                              |
| P                                                                                          | -13.58               | 10.00                 |                             |                                   |
| R279T                                                                                      | -124.89              | 6.12                  | 3                           | 26.4                              |
| R279T+GDP                                                                                  | -11.20               | 7.24                  | 3                           | 93.4                              |
| K241S                                                                                      | -123.85              | 9.26                  | 3                           | 27.0                              |
| K241S+GDP                                                                                  | -9.86                | 4.57                  | 2                           | 94.1                              |
| K16S                                                                                       | -97.63               | 12.49                 | 3                           | 43.4                              |
| K16S+GDP                                                                                   | -13.40               | 6.76                  | 3                           | 92.1                              |
| <b>Mutation affecting GDP inhibition but not ASO<sup>-</sup> transport</b>                 |                      |                       |                             |                                   |
| R185T                                                                                      | -159.18              | 9.74                  | 3                           | 6.2                               |
| R185T+GDP                                                                                  | -86.04               | 5.45                  | 3                           | 49.3                              |
| <b>Mutations affecting ASO<sup>-</sup> transport and GDP inhibition</b>                    |                      |                       |                             |                                   |
| K141T                                                                                      | -103.56              | 6.07                  | 3                           | 38.9                              |
| K141T+GDP                                                                                  | -41.67               | 8.29                  | 3                           | 75.4                              |
| R88T                                                                                       | -69.04               | 7.43                  | 3                           | 59.3                              |
| R88T+GDP                                                                                   | -42.03               | 7.32                  | 3                           | 75.2                              |
| <b>Mutations with no significant effect in ASO<sup>-</sup> transport or GDP inhibition</b> |                      |                       |                             |                                   |
| R76S                                                                                       | -178.02              | 9.27                  | 3                           | -4.9                              |
| R76S+GDP                                                                                   | -10.55               | 7.74                  | 2                           | 93.8                              |
| I30A                                                                                       | -158.66              | 6.54                  | 3                           | 6.5                               |
| I30A+GDP                                                                                   | -2.90                | 7.05                  | 3                           | 98.3                              |
| L278A                                                                                      | -174.64              | 8.52                  | 3                           | -2.9                              |
| L278A+GDP                                                                                  | -12.63               | 5.26                  | 3                           | 92.5                              |

## Supplementary Experimental Procedures

### Expression and Purification of UCP2

DNA encoding residues 14-309 of mouse UCP2 was sub-cloned into the pET-21a vector and overexpressed in *E. Coli* Rossetta DE3 cells with a C-terminal 6His tag in LB media at 37 °C. When the culture reached OD600 = 1.0, the expression was induced with 0.6 mM IPTG at 30 °C. Cell pellets were collected 6 hrs after induction and washed twice in 20 mM potassium phosphate (pH 8.5). The cell mass was recorded, and cells were re-suspended at 100 mg/ml and lysed in a buffer consisting of 20 mM potassium phosphate (pH 7.4), 20 µg/ml lysosime, 5 µg/ml DNase I, 10 mM Mg<sup>2+</sup>, and protease inhibitors for 1 hr at 37 °C. Triton X-100 was added to the lysis solution at 10 µl per gram of cells and the buffer was supplemented with 10 µM GDP and 0.2% BME, and stirred for 2 hr at 4 °C. The suspension was then homogenized using a dounce homogenizer. Unlysed cells and debris were then removed by centrifugation at 1500g for 10 minutes. To the supernatant, 10 mg of 1,2-Dimyristoyl-sn-Glycero-3-Phosphocholine (PC), 2 mg 14:0 cardiolipin (CL) and 0.1 mg 1,2-diphytanoyl-sn-glycero-3-phosphate (PL) was added per gram of cells. Lipids were added as stock solutions solubilized in a 10% detergent mixture (1:1 molar ratio of decyl-maltoside (DM):octyl-glucoside (OG)), followed by stirring for 2 hrs at 4 °C. Membranes in the supernatant were collected by centrifugation at 50,000g for 2 hrs. The pellet was re-suspended in Buffer A (40 mM potassium phosphate, 250 mM NaCl, 10 mM BME, and 10 µM GDP, pH 8.0) with addition of 0.5 mg of PL per gram of cells followed by incubation at 4 °C for 2 hrs. This suspension was homogenized using a dounce homogenizer and debris was discarded. The supernatant was then centrifuged at 50,000g for 2 hrs. The pellet was washed by re-suspension in Buffer A followed by incubation for 4 hrs in Buffer A (10x the initial re-suspension volume) with 0.2% Foscholine-12 (DPC) detergent. Solubilized UCP2 was loaded to a Ni-NTA column and washed with Buffer B (40 mM potassium phosphate, 250 mM NaCl, 0.2% DPC, and 10 mM BME, pH 8.0) and eluted in Buffer B plus 0.6 M imidazole. The buffer was exchanged to low salt condition (10 mM Tris, 50 mM NaCl, and 0.2% DPC, pH 8.0) and the sample was applied to a MonoQ column. The pass-through fraction was incubated with CybaBlue resin at 1 g per gram cells for 1 hr, eluted with 100 mM GDP, concentrated and loaded onto a Sephadex S-200 column equilibrated in 50 mM potassium phosphate (pH 6.5), 100 mM NaCl and 1 µM GDP, 0.01% DPC for a final round of size exclusion purification. Fractions containing UCP2 were pooled and the protein concentrated to ~50 µM. The buffer composition was adjusted to 5 mM GDP, 50 µM CL and 100 µM DMPC, and then the protein was further concentrated to ~10 mg/ml and the buffer exchanged into the measurement conditions. In addition to the lipids carried over from the purification, a typical NMR UCP2-GDP sample contains 0.8

mM UCP2, 100 mM DPC, 5 mM GDP, 5 mM BME, 30 mM potassium phosphate (pH 6.5), and 80 mM NaCl. The mutants were purified following the same protocol.

#### NMR RDC Measurement

RDC measurements were conducted at 33 °C using a 600 MHz spectrometer equipped with cryogenic TXI probes (Bruker). The RDCs were obtained by subtracting  $J$  of the isotropic sample from  $J+D$  of the aligned sample containing 20 mg/ml DNA nanotubes (Douglas et al., 2007) (all other components same as in the isotropic sample). The sign of the RDC follows the convention that  $|^1J_{\text{NH}} + ^1D_{\text{NH}}| < 92$  Hz when  $^1D_{\text{NH}}$  is positive. The  $^{15}\text{N}$ - $^1\text{H}$   $J$  or  $J+D$  were measured using the  $J$ -scaled TROSY-HNCO experiment with two interleaved 3D spectra, the regular TROSY-HNCO spectrum and a modified TROSY-HNCO spectrum with  $J_{\text{NH}}$  evolution during the  $^{15}\text{N}$  chemical shift evolution scaled to zero (Kontaxis et al., 2000). The  $^{13}\text{C}'$ - $^{13}\text{C}^\alpha$   $J$  or  $J+D$  couplings were measured using the 3D TROSY-HNCO experiment with quantitative  $J_{\text{C}'\text{C}^\alpha}$  modulations of 0 and 28 ms (Jaroniec et al., 2004).

## Supplementary Reference

- Douglas, S.M., Chou, J.J., and Shih, W.M. (2007). DNA-nanotube-induced alignment of membrane proteins for NMR structure determination. *Proc Natl Acad Sci U S A* *104*, 6644-6648.
- Jaroniec, C.P., Ulmer, T.S., and Bax, A. (2004). Quantitative J correlation methods for the accurate measurement of  $^{13}\text{C}$ - $^{13}\text{C}$  dipolar couplings in proteins. *J Biomol NMR* *30*, 181-194.
- Kontaxis, G., Clore, G., and Bax, A. (2000). Evaluation of cross-correlation effects and measurement of one-bond couplings in proteins with short transverse relaxation times. *J Magn Reson* *143*, 184-196.
- Li, L., Li, C., Sarkar, S., Zhang, J., Witham, S., Zhang, Z., Wang, L., Smith, N., Petukh, M., and Alexov, E. (2012). DelPhi: a comprehensive suite for DelPhi software and associated resources. *BMC biophysics* *5*, 9.
- Sievers, F., Wilm, A., Dineen, D., Gibson, T.J., Karplus, K., Li, W., Lopez, R., McWilliam, H., Remmert, M., Soding, J., *et al.* (2011). Fast, scalable generation of high-quality protein multiple sequence alignments using Clustal Omega. *Molecular systems biology* *7*, 539.
